# Supplementary material for: A novel microfluidic system for the sensitive and cost-effective detection of okadaic acid in mussels
Source: Royal Society of Chemistry journal article supplement (doi:10.1039/d0an02092c), 2021-01-01
Supplement: d0an02092c1.pdf [file d0an02092c1.pdf]

# **A novel microfluidic system for the sensitive and cost-efficient detection of okadaic acid in mussels**

Ana Castanheira, Marília Barreiros dos Santos, Laura Rodriguez-Lorenzo,  
Raquel Queirós, Begoña Espiña\*

INL- International Iberian Nanotechnology Laboratory, Avenida Mestre José Veiga s/n 4715-330  
Braga, Portugal

**12<sup>th</sup> November 2021**

**Note added after first publication:** This Supplementary Information file replaces that originally published on 9<sup>th</sup> February 2021.

## **Supporting Information**

## A.1. Design and development of the microfluidic chambers

The microfluidic chambers consist of 2 independent pieces of PMMA, delimited by an O-ring of PDMS (Figure A1. (a)) and supported by screws (Figure A1 (b)). Figure A.1 (c) shows the design of the chamber and its correspondent dimensions (7.5x5x1.5mm).

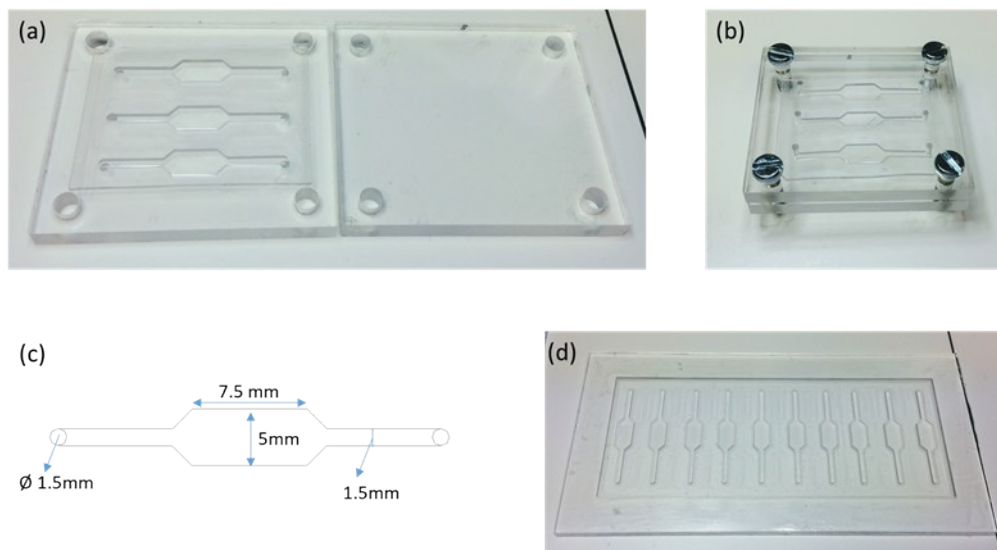

Figure A.1. Image of the (a) disassembled and (b) assembled microfluidic chambers; (c) Design of the microfluidic chambers; (d) mold used for the fabrication of the O-rings.

PDMS O-rings were fabricated by replica molding using a 10:1(w/w) pre-polymer and curing agent mixture. This mixture was poured over the mold (Figure A1. (d)), degassed and cured for 1.5 h at 65 °C. The two pieces of PMMA and the O-ring mold were designed in ArtCAM and fabricated in PMMA using a Computer Numerical Control (CNC) - High Speed Milling System (FlexiCam Viper, Germany). The top part of the PMMA piece include the inlet and the outlet, which were connected by 1.5 mm O.D. Tygon tube.

## A.2. Characterization of sol-gel

### A.2.1. Scanning electron microscopy (SEM)

Al<sub>2</sub>O<sub>3</sub> sol-gel suspension (50 µL) was deposited on 1×1 cm silicon substrate. After the sol-gel drying overnight at RT, the samples were analyzed by SEM. SEM analysis was

carried out on a FEI Quanta 650 FEG (FEI Europe B.V.) using electron acceleration voltage of 20 (high vacuum mode), at 70 Pa. Secondary electrons were detected by an Everhardt Thornley SED (secondary electron detector).

SEM analysis of the  $\text{Al}_2\text{O}_3$  sol-gel surface was carried out to compare the surface morphologies. As can be seen in Figure A.2 the surface of  $\text{Al}_2\text{O}_3$  sol-gel film is a rough surface with globular structures. The rough topography indicates the potential of loading large amount of biomolecules on the surface.

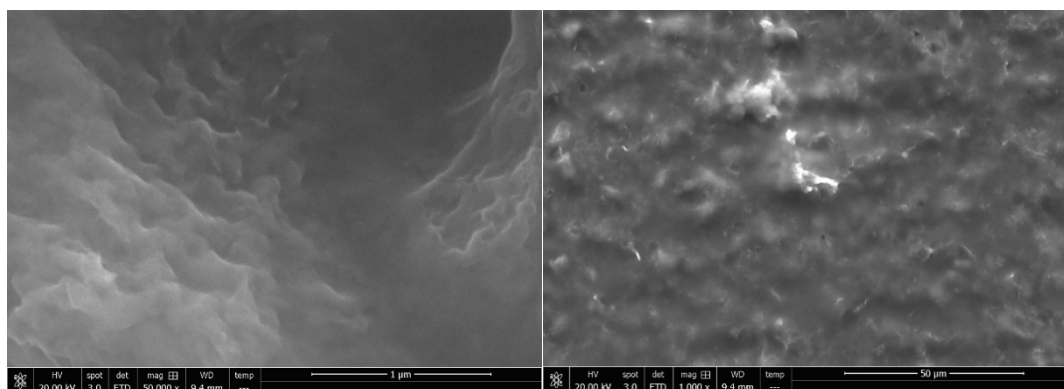

Figure A.2. SEM image of the  $\text{Al}_2\text{O}_3$  sol-gel surface with magnification of 50000x, Scale bars = 1  $\mu\text{m}$ , (*left*) and 1000x, Scale bars = 50  $\mu\text{m}$  (*right*).

#### A.2.2. Fourier-transform infrared spectroscopy (FTIR)

The  $\text{Al}_2\text{O}_3$  sol-gel in PDMS was analyzed using an evacuated optic bench VERTEX 80v vacuum FTIR spectrometer, from Bruker, equipped with a MIR source and a DLaTGs detector operating at RT in spectral range from 12000 to 250  $\text{cm}^{-1}$  with KBr window. An ATR (attenuated total reflection) accessory with diamond crystal was used. Data were collected with a 4  $\text{cm}^{-1}$  resolution and an accumulated of 64 scans for each spectrum.

Figure A.3. shows the FTIR spectrum of PDMS (blue spectrum) and  $\text{Al}_2\text{O}_3$  sol-gel on PDMS (yellow). It is possible to see the representative bands of PDMS: Si-O-Si (955  $\text{cm}^{-1}$ ), Si-CH<sub>3</sub> symmetric rocking (687  $\text{cm}^{-1}$ ), CH<sub>3</sub> asymmetric rocking + Si-C asymmetric stretching (787  $\text{cm}^{-1}$ ), CH<sub>3</sub> symmetric rocking (862  $\text{cm}^{-1}$ ), CH<sub>3</sub> symmetric bending (1262  $\text{cm}^{-1}$ ), and CH stretching in CH<sub>3</sub> (2950  $\text{cm}^{-1}$ ).<sup>1</sup> The  $\text{Al}_2\text{O}_3$  sol-gel spectra presents representative bands at 600  $\text{cm}^{-1}$ , 730  $\text{cm}^{-1}$  and 1060  $\text{cm}^{-1}$ . The band at 1060  $\text{cm}^{-1}$  could

indicate the vibration modes of Al-O tetrahedra, whereas those around  $600\text{ cm}^{-1}$  and  $730\text{ cm}^{-1}$  are assigned to stretching vibrations of  $\text{AlO}_6$  octahedra.<sup>2, 3</sup>

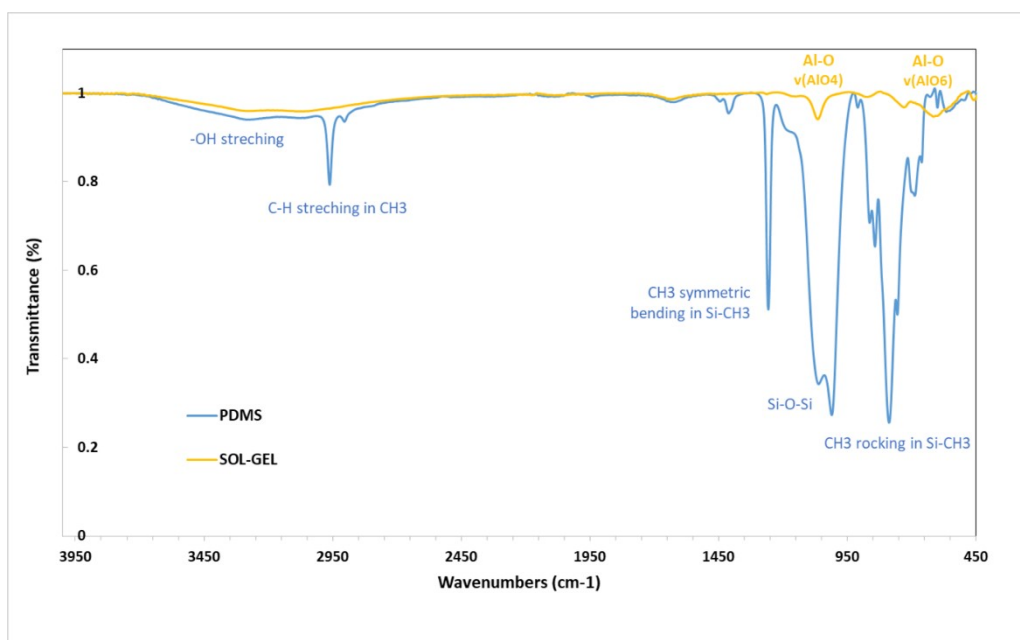

Figure A.3. FTIR spectrum of PDMS (blue spectrum) and  $\text{Al}_2\text{O}_3$  sol-gel on PDMS (yellow).

### A.2.3. RAMAN

The  $\text{Al}_2\text{O}_3$  sol-gel in PDMS was analyzed by Raman spectroscopy (Alpha 300R Confocal Raman microscope Witec) using a 633 nm laser excitation wavelength (grating 600 gr/cm) and a  $50\times$  objective. Acquisition of spectra was performed for 0.5 s and ten scans per measurement were collected at a laser power of 5 mW. The resulting Raman spectra were processed with the Spectragryph software for baseline and cosmic ray removal corrections and Origin 9.0 software for figure preparation.

Figure A.4. shows the Raman spectrum of PDMS (blue spectrum) which has the follow representative bands: Si-O-Si symmetric stretching ( $488\text{ cm}^{-1}$ ), Si- $\text{CH}_3$  symmetric rocking ( $687\text{ cm}^{-1}$ ), Si-C symmetric stretching ( $708\text{ cm}^{-1}$ ),  $\text{CH}_3$  asymmetric rocking + Si-C asymmetric stretching ( $787\text{ cm}^{-1}$ ),  $\text{CH}_3$  symmetric rocking ( $862\text{ cm}^{-1}$ ),  $\text{CH}_3$  symmetric bending ( $1262\text{ cm}^{-1}$ ),  $\text{CH}_3$  asymmetric bending ( $1412\text{ cm}^{-1}$ ).<sup>4</sup> Additionally, the spectrum of the alumina sol-gel produced in the PMMA chamber is also represented. This SERS spectrum clearly shows the vibrational fingerprint of boehmite phase,  $\gamma\text{-AlO}(\text{OH})$ , which is the predominant phase present the alumina gels formed by hydrolysis/condensation process,<sup>5</sup> dominated by Al-O symmetric stretching mode ( $357\text{ cm}^{-1}$ ), double degenerated

mode of the  $\text{AlO}_6$  octahedron ( $498$  and  $678\text{ cm}^{-1}$ ), as described previously.<sup>6</sup> Figure A.3. shows also the Raman spectra of supported on PDMS. As expected, each Raman spectrum resulted in a mixture of the presence of the  $\text{Al}_2\text{O}_3$  sol-gel and PDMS. However, the characteristic peak centered at  $357\text{ cm}^{-1}$  does not overlap with the characteristic peaks of the PDMS.

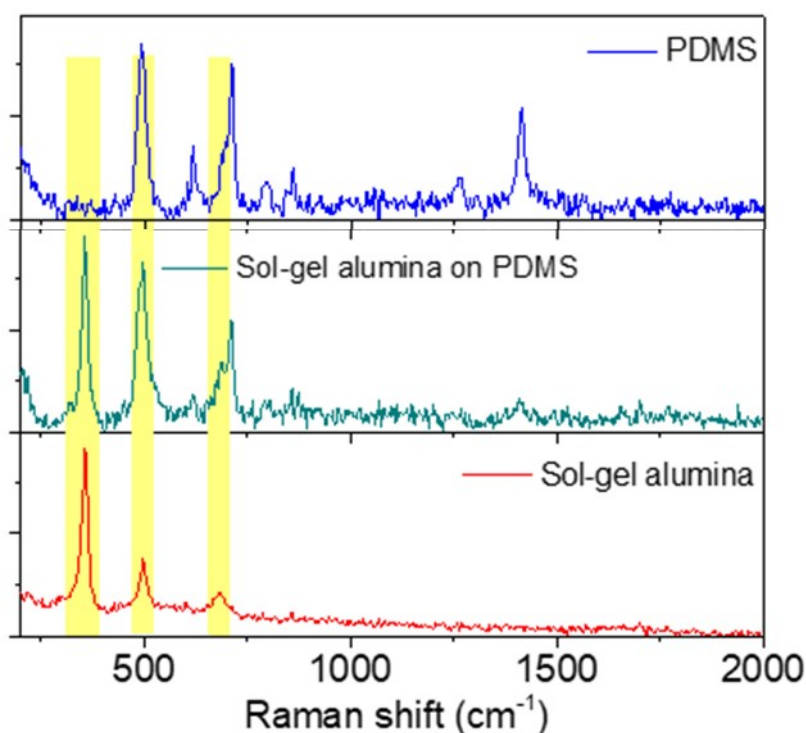

A.4. Raman spectra of PDMS (blue spectrum), alumina sol-gel produced in the PMMA chamber (green) and sol-gel alumina (red). The characteristic peaks for sol-gel are labeled with yellow shaded areas.

### A.3. Immobilization of proteins in the microfluidic chamber

The immobilization of proteins in the microfluidic chamber modified with sol-gel was characterized by fluorescence microscopy using fluorescent labelled protein A as standard protein to PP1, since they have a similar molecular weight. A solution of protein A ( $0.22\text{ mg/mL}$  in PBS) was injected on the sol-gel modified chamber (section 2.4.2), incubated during 1 h and the chambers were finally washed with PBS. The fluorescent images were obtained using a Wide-Field Upright Fluorescence Microscope (Nikon). Figure A.5 shows the results obtained for the immobilized FITC-protein A in sol-gel and its control (without sol-gel). It can be clearly identified the fluorescent signal of the protein

on the sol-gel modified chamber, demonstrating the successful protein immobilization in the  $\text{Al}_2\text{O}_3$  sol-gel.

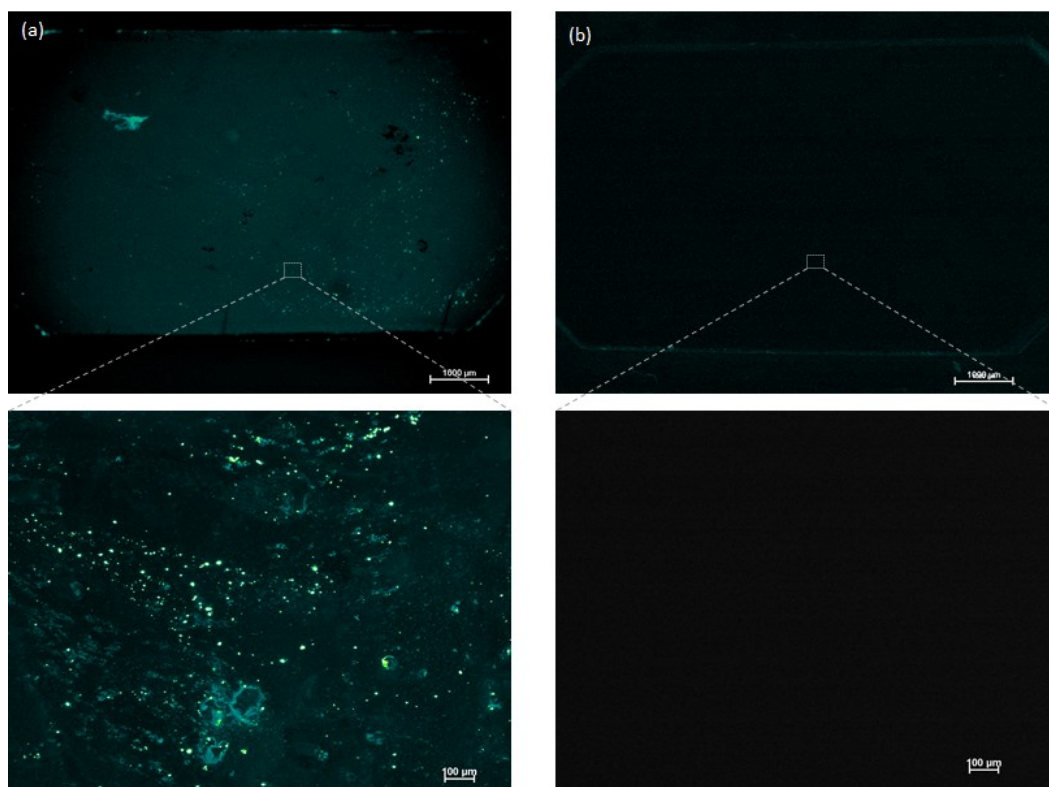

Figure A.5. Fluorescent images for the (a) immobilized FITC-protein A in sol-gel and (b) the control (without sol-gel).

Table A1. Reported sensors platforms for the detection of OA according to the type of sensor,

| Author                          | Detection method                                                 | Bioreceptor | Type of sensor                                                       | LOD (nM)                           | Dynamic range (nM)                                   | Reference |
|---------------------------------|------------------------------------------------------------------|-------------|----------------------------------------------------------------------|------------------------------------|------------------------------------------------------|-----------|
| Xuan Weng et al 2017            | fluorescence                                                     | aptamers    | PDMS/paper microfluidic aptasensor functionalized by graphene oxide  | 0.5                                | 0- 7.4                                               | 7         |
| Linjiang Panga et al 2019       | colorimetric                                                     | antibodies  | competitive ELISA assay based on epoxy-functionalized magnetic beads | 0.4                                | 0.4 – 31                                             | 8         |
| Saipriya Ramalingama et al 2019 | electrochemical                                                  | aptamer     | electrochemical microfluidic biochip                                 | 0.008                              | 10–250                                               | 9         |
| Kaiqi Su et al 2017             | image analysis and cell counting assay to monitor the reflection | HepG2 cells | portable smartphone-based cell viability biosensor system            | 42.7                               | 12.4- 993.7                                          | 10        |
| Our work                        | Colorimetric                                                     | PP1         | microfluidic system based on PP1 inhibition                          | 11.6<br>11.0 $\mu\text{g kg}^{-1}$ | 43.4 to 3095.8<br>19.7-15767.3 $\mu\text{g kg}^{-1}$ |           |

LOD and dynamic range obtained.

## References

1. A. R. Passos, S. H. Pulcinelli, V. Briois and C. V. Santilli. (2016) High surface area hierarchical porous  $\text{Al}_2\text{O}_3$  prepared by the integration of sol–gel transition and phase separation, RSC Adv., 2016,6, 57217-57226.
2. N. P. Damayanti (2010) Preparation of superhydrophobic PET fabric from  $\text{Al}_2\text{O}_3$ – $\text{SiO}_2$  hybrid: geometrical approach to create high contact angle surface from low contact angle materials. Journal of Sol-Gel Science and Technology volume 56, 47–52.
3. Daniela C.L. Vasconcelos Eduardo H.M. Nunes Wander L. Vasconcelos.(2012) AES and FTIR characterization of sol–gel alumina films Journal of Non-Crystalline Solids, 2016, 358, Issue 11, 1374-1379

4. Bae, S. C.; Lee, H.; Lin, Z.; Granick, S. (2005) Chemical Imaging in a Surface Forces Apparatus: Confocal Raman Spectroscopy of Confined Poly(Dimethylsiloxane). *Langmuir* 2005, 21 (13), 5685–5688.
5. Doss, C.J.; Zallen, R. (1993) Raman studies of sol-gel alumina: Finite-size effects in nanocrystalline AlO(OH). *Physical Review B* 1993, 48, 15626-15637.
6. Yang, J.; Frost, R.L. (2008) Synthesis and Characterization of Boehmite Nanofibers. *Research Letters in Inorganic Chemistry* 2008, 2008, 602198.
7. Weng, X, Neethirajan, S. (2018) Paper-based microfluidic aptasensor for food safety. *J Food Saf.* 2018; 38:e12412.
8. Linjiang Pang, Haoran Quan, Ying Sun, Pingya Wang, Daifu Ma, Pengqian Mu, Tingting Chai, Yiming Zhang & Bruce D. Hammock (2019) A rapid competitive ELISA assay of Okadaic acid level based on epoxy-functionalized magnetic beads, *Food and Agricultural Immunology*, 30:1, 1286-1302,
9. Ramalingam S, Chand R, Singh CB, Singh A (2019) Phosphorene-gold nanocomposite based microfluidic aptasensor for the detection of okadaic acid. *Biosens Bioelectron* 135:14–21.
10. Su K, Pan Y, Wan Z, et al (2017) Smartphone-based portable biosensing system using cell viability biosensor for okadaic acid detection. *Sensors Actuators, B Chem* 251:134–143.
